# Supplementary material for: Genomic Regions Associated With Salinity Stress Tolerance in Tropical Maize (Zea Mays L.)
Source: Front Plant Sci. 2022 May 31;13:869270. doi: 10.3389/fpls.2022.869270 (PMC9194767; doi:10.3389/fpls.2022.869270)
Supplement: Supplementary file 1 [file Data_Sheet_1.xlsx]

## Sheet: Supple fig-1
Supplementary Figure 3. QQ-plots for GY, AD and ASI for 2017, 2018 and across year

## Sheet: Supple fig-2
Supplementary Figure 4. QQ plots for GC,CL and KN for 2018

## Sheet: Supple fig-3
Supplementary Figure 1. Significant MTAs for GY, AD and ASI for 2017, 2018 and across year

## Sheet: Supple fig-4
Supplementary Figure 2. Significant MTAs for GC,CL and KN for 2018
