# Supplementary material for: Genomic Regions Associated With Salinity Stress Tolerance in Tropical Maize (Zea Mays L.)
Source: Front Plant Sci. 2022 May 31;13:869270. doi: 10.3389/fpls.2022.869270 (PMC9194767; doi:10.3389/fpls.2022.869270)
Supplement: Supplementary file 2 [file Data_Sheet_2.xlsx]

## Sheet: Supple table-1
Supplementary table 1: Marker trait assocaiton for the traits under salinity stress
S.No	Triat and year	Trait	Year	Marker	Position in Mb	Chrom No	Position	Gene Name	P-Value	Proportion of Variance Explained	Effect	Putative biological functions
1	GY-Across	GY	Across	S1_202305536	202.306	1	202305536		5.23397e-05	0.0556963	0.0821549
2	GY-Across	GY	Across	S1_281069408	281.069	1	281069408	GRMZM5G843914_T01, GRMZM5G843914_T02, GRMZM5G843914_T03	3.1379e-05	0.0589023	-0.0626338
3	GY-Across	GY	Across	S1_281069409	281.069	1	281069409	GRMZM5G843914_T01, GRMZM5G843914_T02, GRMZM5G843914_T03	8.36385e-05	0.0527573	-0.0606861
4	GY-Across	GY	Across	S2_39327598	39.3276	2	39327598	GRMZM2G155491_T01	8.88187e-06	0.0667983	-0.0341716
5	GY-Across	GY	Across	S4_83197497	83.1975	4	83197497	GRMZM2G168002_T05, GRMZM2G168002_T04, GRMZM2G168002_T01, GRMZM2G168002_T03, GRMZM2G168002_T02, GRMZM5G853948_T04, GRMZM5G853948_T02, GRMZM5G853948_T03, GRMZM5G853948_T01	4.26949e-06	0.0713694	-0.0415047	glk49 - G2-like-transcription factor 49
6	GY-Across	GY	Across	S4_83197515	83.1975	4	83197515	GRMZM2G168002_T05, GRMZM2G168002_T04, GRMZM2G168002_T01, GRMZM2G168002_T03, GRMZM2G168002_T02, GRMZM5G853948_T04, GRMZM5G853948_T02, GRMZM5G853948_T03, GRMZM5G853948_T01	2.82459e-05	0.0595612	-0.0355689
7	GY-Across	GY	Across	S5_20794643	20.7946	5	20794643	GRMZM2G090576_T01	3.73421e-05	0.0578123	0.0158554
8	GY-Across	GY	Across	S7_86024819	86.0248	7	86024819		2.47646e-05	0.0603849	-0.0208482
9	GY-Across	GY	Across	S9_5876850	5.87685	9	5876850		5.87994e-05	0.0549667	-0.0635298
10	GY-Across	GY	Across	S10_128699484	128.699	10	128699484	GRMZM2G071360_T02, GRMZM2G071360_T01	5.77906e-05	0.0550752	-0.033319
11	GY-Across	GY	Across	S10_128699515	128.7	10	128699515	GRMZM2G071360_T02, GRMZM2G071360_T01	5.77906e-05	0.0550752	-0.033319
12	GY-2018	GY	2018	S1_85990034	85.99	1	85990034	GRMZM2G453832_T01	9.28457e-05	0.0521023	-0.299055	Mgt-6 magnesium transporter6
13	GY-2018	GY	2018	S3_187169134	187.169	3	187169134	GRMZM2G036099_T01, GRMZM2G036099_T02, GRMZM2G502376_T01	6.97922e-05	0.0538921	-0.177959	Cupin
14	GY-2018	GY	2018	S3_210749183	210.749	3	210749183	GRMZM2G024448_T01	2.0066e-05	0.0617019	0.439422	Oxidation reduction process
15	GY-2018	GY	2018	S4_190375543	190.376	4	190375543	GRMZM2G013271_T01	7.1089e-05	0.0537767	-0.0441627	ofp22 - OVATE-transcription factor 22
16	GY-2018	GY	2018	S5_166934277	166.934	5	166934277	GRMZM2G177356_T01	5.88102e-05	0.0549655	-0.0407372	protein_coding
17	GY-2018	GY	2018	S5_205033670	205.034	5	205033670	GRMZM2G375762_T01	3.2472e-05	0.0586878	-0.151501	Dynein light chain
18	GY-2018	GY	2018	S6_82015505	82.0155	6	82015505		2.06747e-05	0.0615149	-0.429299
19	GY-2018	GY	2018	S6_87402488	87.4025	6	87402488	GRMZM2G114337_T01	8.32719e-05	0.0527848	0.384301	Core-2/I-branching beta-16-N-acetylglucosaminyltransferase family protein
20	GY-2018	GY	2018	S6_157029254	157.029	6	157029254		4.48852e-06	0.0710575	-0.12401
21	GY-2018	GY	2018	S6_157029418	157.029	6	157029418		3.28777e-05	0.05861	-0.152539
22	GY-2018	GY	2018	S7_15827091	15.8271	7	15827091	GRMZM2G478965_T01	7.6743e-05	0.0532968	-0.255838	(ereb166 - AP2-EREBP-transcription factor 166)
23	GY-2018	GY	2018	S8_159549662	159.55	8	159549662		3.54619e-05	0.058136	-0.230923
24	GY-2018	GY	2018	S9_12106484	12.1065	9	12106484	GRMZM2G467169_T01, GRMZM2G467169_T02	3.43683e-05	0.0583322	-0.207716
25	GY-2018	GY	2018	S9_12109189	12.1092	9	12109189	GRMZM2G467169_T01, GRMZM2G467169_T02	7.24351e-05	0.0536591	0.214176
26	GY-2017	GY	2017	S1_187436342	187.436	1	187436342		5.17656e-05	0.0557654	0.178255
27	GY-2017	GY	2017	S1_276683126	276.683	1	276683126	GRMZM2G177867_T02	7.90302e-06	0.0675276	-0.0614924	protein_coding
28	GY-2017	GY	2017	S2_38705331	38.7053	2	38705331	GRMZM2G124096_T01	2.6474e-06	0.074346	-0.240788	protein_coding
29	GY-2017	GY	2017	S2_38705733	38.7057	2	38705733	GRMZM2G124096_T01	3.11397e-06	0.0733355	-0.229426
30	GY-2017	GY	2017	S2_39295432	39.2954	2	39295432		1.18074e-05	0.0650191	-0.205073
31	GY-2017	GY	2017	S2_58759336	58.7593	2	58759336		7.27249e-05	0.053634	0.0366377
32	GY-2017	GY	2017	S3_151971414	151.971	3	151971414	GRMZM2G065585_T01	6.34446e-05	0.05449	0.21664	glucan endo-1,3-beta-glucosidase homolog1
33	GY-2017	GY	2017	S5_22884763	22.8848	5	22884763		7.45327e-05	0.0534801	0.259682
34	GY-2017	GY	2017	S5_69435496	69.4355	5	69435496	GRMZM2G117012_T01	1.31986e-05	0.0643228	0.230751	protein_coding
35	GY-2017	GY	2017	S5_69435513	69.4355	5	69435513	GRMZM2G117012_T01	3.50377e-05	0.0582114	0.219838
36	GY-2017	GY	2017	S5_69435514	69.4355	5	69435514	GRMZM2G117012_T01	3.50377e-05	0.0582114	0.219838
37	GY-2017	GY	2017	S5_164855465	164.855	5	164855465	GRMZM5G872392_T03, GRMZM5G872392_T01, GRMZM5G872392_T02	6.4132e-05	0.0544224	0.16161	sweet-15b
38	GY-2017	GY	2017	S5_168666071	168.666	5	168666071	GRMZM2G004715_T01	7.83065e-05	0.0531703	0.195629	protein_coding
39	GY-2017	GY	2017	S5_191376709	191.377	5	191376709	GRMZM2G057386_T01	2.66187e-06	0.0743121	-0.16795	ereb107 - AP2-EREBP-transcription factor 107
40	GY-2017	GY	2017	S5_209867036	209.867	5	209867036	GRMZM2G103128_T01	9.29464e-05	0.0520955	-0.150849	Fucosyltransferase
41	GY-2017	GY	2017	S7_172512783	172.513	7	172512783	GRMZM2G414475_T01	1.54889e-05	0.063322	-0.125323	protein_coding
42	GY-2017	GY	2017	S8_32895805	32.8958	8	32895805		2.00712e-05	0.0617003	-0.0758522
43	GY-2017	GY	2017	S8_35231586	35.2316	8	35231586		7.87655e-05	0.0531337	0.140769
44	GY-2017	GY	2017	S8_35447245	35.4472	8	35447245		2.29539e-05	0.0608603	0.211108
45	GY-2017	GY	2017	S8_136133964	136.134	8	136133964	GRMZM2G100229_T01	6.42991e-05	0.0544061	0.200468	protein_coding
46	GY-2017	GY	2017	S8_136134503	136.135	8	136134503	GRMZM2G100229_T01	3.45689e-05	0.0582958	0.196335
47	GY-2017	GY	2017	S8_136138158	136.138	8	136138158	GRMZM2G100229_T01	3.021e-05	0.0591401	0.152151
48	GY-2017	GY	2017	S8_136413525	136.414	8	136413525	AC207342.3_FGT008	2.41798e-06	0.07491	0.222953
49	AD-Across	AD	Across	S1_250092554	250.093	1	250092554	GRMZM2G065498_T01, GRMZM2G364069_T01	3.5646e-05	0.0597275	-1.69718
50	AD-Across	AD	Across	S1_250893506	250.894	1	250893506	GRMZM2G014392_T01	7.49369e-06	0.0697462	1.07129	vp14
51	AD-Across	AD	Across	S1_300272491	300.272	1	300272491	GRMZM2G036169_T01	9.97266e-05	0.0531028	0.0641099	lug3 - leunig-related3
52	AD-Across	AD	Across	S2_75423469	75.4235	2	75423469	AC197056.3_FGT005	9.3575e-05	0.053513	-1.8714
53	AD-Across	AD	Across	S2_208999109	208.999	2	208999109		1.58944e-05	0.0649207	1.69776
54	AD-Across	AD	Across	S2_209496839	209.497	2	209496839	GRMZM5G873123_T02, GRMZM5G873123_T01	9.43367e-06	0.0682697	2.12625	protein_coding
55	AD-Across	AD	Across	S2_211029206	211.029	2	211029206	GRMZM2G101142_T01	1.90901e-05	0.0637435	2.0191	protein_coding
56	AD-Across	AD	Across	S3_122496340	122.496	3	122496340		5.70488e-05	0.0567003	-3.82518
57	AD-Across	AD	Across	S3_206753164	206.753	3	206753164		3.81258e-05	0.0592947	1.63671
58	AD-Across	AD	Across	S4_214528333	214.528	4	214528333	GRMZM2G000576_T01	4.18337e-05	0.0586974	1.23174	protein_coding
59	AD-Across	AD	Across	S4_219994248	219.994	4	219994248	GRMZM2G051185_T01	7.3025e-05	0.0551103	0.50199	protein_coding
60	AD-Across	AD	Across	S4_235453550	235.454	4	235453550	GRMZM2G339909_T01	8.09887e-06	0.0692482	-2.45014	protein_coding
61	AD-Across	AD	Across	S5_69435496	69.4355	5	69435496	GRMZM2G117012_T01	2.37799e-05	0.0623314	-1.21186	protein_coding
62	AD-Across	AD	Across	S5_69435513	69.4355	5	69435513	GRMZM2G117012_T01	2.67361e-05	0.0615779	-1.26245
63	AD-Across	AD	Across	S5_69435514	69.4355	5	69435514	GRMZM2G117012_T01	2.67361e-05	0.0615779	-1.26245
64	AD-Across	AD	Across	S5_163119125	163.119	5	163119125	GRMZM2G043602_T01, GRMZM2G043602_T03, GRMZM2G043602_T02	6.7533e-05	0.0556138	-1.27744	protein_coding
65	AD-Across	AD	Across	S5_165071094	165.071	5	165071094	GRMZM2G147335_T03, GRMZM2G147335_T02, GRMZM2G147335_T01, GRMZM5G809087_T01	8.8206e-05	0.0538936	2.37441	protein_coding
66	AD-Across	AD	Across	S5_165071180	165.071	5	165071180	GRMZM2G147335_T03, GRMZM2G147335_T02, GRMZM2G147335_T01, GRMZM5G809087_T01	8.8206e-05	0.0538936	2.36811
67	AD-Across	AD	Across	S5_212245497	212.245	5	212245497	GRMZM2G098058_T01, GRMZM2G098058_T02, GRMZM2G098058_T03	8.90798e-05	0.0538301	-4.92207	protein_coding
68	AD-Across	AD	Across	S6_27336376	27.3364	6	27336376	GRMZM2G075286_T01	8.82315e-05	0.0538918	2.22718	protein_coding
69	AD-Across	AD	Across	S6_157569199	157.569	6	157569199	GRMZM2G305115_T01, GRMZM2G305115_T03, GRMZM2G305115_T04, GRMZM2G305115_T02	5.84336e-05	0.0565459	2.36783	crt3 - Calreticulin3
70	AD-Across	AD	Across	S8_79188751	79.1888	8	79188751	GRMZM2G012901_T01	8.3819e-05	0.0542223	0.583103	protein_coding
71	AD-Across	AD	Across	S9_141848482	141.848	9	141848482		5.07181e-05	0.0574577	1.32369
72	AD-Across	AD	Across	S9_146154415	146.154	9	146154415	AC233893.1_FGT006, GRMZM5G821841_T01	2.254e-05	0.0626757	-1.13214	protein_coding
73	AD-Across	AD	Across	S9_153775211	153.775	9	153775211	GRMZM2G064005_T01	8.26682e-05	0.0543113	-0.982198	protein_coding
74	AD-2018	AD	2018	S1_250893506	250.894	1	250893506	GRMZM2G014392_T01	3.39178e-05	0.0584149	0.843098	vp14
75	AD-2018	AD	2018	S1_290109325	290.109	1	290109325	GRMZM2G062377_T01	8.60057e-05	0.0525822	-0.198348	protein_coding
76	AD-2018	AD	2018	S2_193843706	193.844	2	193843706	GRMZM2G170253_T01, GRMZM2G471224_T01	6.34618e-05	0.0544883	-2.58755	protein_coding
77	AD-2018	AD	2018	S2_194355749	194.356	2	194355749	AC199782.5_FGT003	3.67198e-05	0.0579176	-2.29002
78	AD-2018	AD	2018	S2_208999109	208.999	2	208999109		2.12895e-06	0.0757018	1.57077
79	AD-2018	AD	2018	S2_209496839	209.497	2	209496839	GRMZM5G873123_T02, GRMZM5G873123_T01	5.76618e-05	0.0550892	1.77813	protein_coding
80	AD-2018	AD	2018	S2_211723140	211.723	2	211723140	GRMZM2G056467_T01	6.20646e-05	0.0546279	-1.8902	protein_coding
81	AD-2018	AD	2018	S3_175689183	175.689	3	175689183		9.81663e-06	0.0661732	-1.19428
82	AD-2018	AD	2018	S4_219994248	219.994	4	219994248	GRMZM2G051185_T01	7.95778e-05	0.0530694	0.540697	protein_coding
83	AD-2018	AD	2018	S4_236093676	236.094	4	236093676	GRMZM2G351747_T01, GRMZM2G351747_T03, GRMZM2G351747_T02, GRMZM2G351747_T04	7.62827e-05	0.0533345	2.07357	protein_coding
84	AD-2018	AD	2018	S5_172100748	172.101	5	172100748	GRMZM2G414955_T01	9.82109e-05	0.05175	-1.24191	protein_coding
85	AD-2018	AD	2018	S6_76236247	76.2362	6	76236247		5.15489e-05	0.0557917	1.90126
86	AD-2018	AD	2018	S6_161833452	161.833	6	161833452	GRMZM2G021406_T01	5.36532e-05	0.0555409	-1.96439	protein_coding
87	AD-2018	AD	2018	S8_62836711	62.8367	8	62836711	GRMZM2G079938_T02, GRMZM2G079938_T01, GRMZM2G079938_T04, GRMZM2G079938_T05	3.87524e-05	0.05758	0.147314	AB hydrolase-1 domain-containing protein
88	AD-2018	AD	2018	S8_79188751	79.1888	8	79188751	GRMZM2G012901_T01	1.90151e-05	0.0620386	0.619651	protein_coding
89	AD-2018	AD	2018	S10_130700001	130.7	10	130700001	GRMZM2G061499_T02, GRMZM2G061499_T01, GRMZM2G061499_T03, GRMZM2G061499_T04	4.85752e-05	0.0561641	2.3848	protein_coding
90	AD-2017	AD	2017	S1_154507157	154.507	1	154507157	GRMZM2G092652_T01, GRMZM2G393399_T01	7.27713e-05	0.05363	4.38688	U-box domain-containing protein 13
91	AD-2017	AD	2017	S1_212981974	212.982	1	212981974	GRMZM2G152485_T06, GRMZM2G152485_T01, GRMZM2G152485_T07, GRMZM2G152485_T02, GRMZM2G152485_T03, GRMZM2G152485_T05, GRMZM2G152485_T04, GRMZM2G152485_T08	3.32238e-05	0.0585444	4.05177	protein_coding
92	AD-2017	AD	2017	S1_251143915	251.144	1	251143915	GRMZM5G859316_T03, GRMZM5G859316_T02, GRMZM5G859316_T01	7.21928e-05	0.0536801	2.28348	Expansins
93	AD-2017	AD	2017	S2_29055731	29.0557	2	29055731		4.12906e-05	0.0571824	1.04655
94	AD-2017	AD	2017	S2_211029206	211.029	2	211029206	GRMZM2G101142_T01	8.63499e-05	0.0525572	3.10896	protein_coding
95	AD-2017	AD	2017	S3_3986819	3.98682	3	3986819		8.86941e-05	0.0523892	-2.50135
96	AD-2017	AD	2017	S3_206753164	206.753	3	206753164		4.56423e-05	0.0565545	2.40383
97	AD-2017	AD	2017	S4_159570347	159.57	4	159570347		4.46264e-05	0.0566956	-5.8677
98	AD-2017	AD	2017	S4_159570360	159.57	4	159570360		4.46264e-05	0.0566956	-5.8677
99	AD-2017	AD	2017	S4_235453550	235.454	4	235453550	GRMZM2G339909_T01	6.31431e-06	0.0689287	-4.0272	protein_coding
100	AD-2017	AD	2017	S5_2923914	2.92391	5	2923914	GRMZM2G423139_T01, GRMZM5G889126_T01	7.6933e-05	0.0532813	2.30625	protein_coding
101	AD-2017	AD	2017	S5_6867779	6.86778	5	6867779	GRMZM2G072315_T02, GRMZM2G072315_T03, GRMZM2G072315_T01	6.45295e-05	0.0543837	-2.52298	protein_coding
102	AD-2017	AD	2017	S5_69125623	69.1256	5	69125623	GRMZM2G152914_T01	4.56021e-05	0.05656	-4.88938	protein_coding
103	AD-2017	AD	2017	S5_69283534	69.2835	5	69283534	GRMZM2G160996_T02, GRMZM2G160996_T01	8.42155e-05	0.0527141	-4.68934	protein_coding
104	AD-2017	AD	2017	S5_69435496	69.4355	5	69435496	GRMZM2G117012_T01	2.66166e-05	0.0599333	-1.97429	protein_coding
105	AD-2017	AD	2017	S5_69435513	69.4355	5	69435513	GRMZM2G117012_T01	3.29238e-05	0.0586012	-2.05392
106	AD-2017	AD	2017	S5_69435514	69.4355	5	69435514	GRMZM2G117012_T01	3.29238e-05	0.0586012	-2.05392
107	AD-2017	AD	2017	S5_82325945	82.3259	5	82325945	GRMZM2G171648_T01	2.16944e-05	0.0612136	2.73021	protein_coding
108	AD-2017	AD	2017	S5_82953084	82.9531	5	82953084	GRMZM2G158520_T01	8.37274e-05	0.0527506	1.89211	protein_coding
109	AD-2017	AD	2017	S5_145140411	145.14	5	145140411		9.27506e-05	0.0521088	-0.204006
110	AD-2017	AD	2017	S5_163119125	163.119	5	163119125	GRMZM2G043602_T01, GRMZM2G043602_T03, GRMZM2G043602_T02	3.61864e-05	0.0580093	-2.15275	protein_coding
111	AD-2017	AD	2017	S5_212245497	212.245	5	212245497	GRMZM2G098058_T01, GRMZM2G098058_T02, GRMZM2G098058_T03	8.52369e-05	0.0526385	-7.37613	protein_coding
112	AD-2017	AD	2017	S8_166837731	166.838	8	166837731	GRMZM2G316534_T01	4.6854e-05	0.0563903	-3.52707	protein_coding
113	AD-2017	AD	2017	S9_1634820	1.63482	9	1634820	GRMZM2G143862_T01	9.29606e-05	0.0520946	0.730636
114	AD-2017	AD	2017	S9_130860645	130.861	9	130860645		5.40857e-05	0.0554906	-5.16489
115	AD-2017	AD	2017	S9_146154415	146.154	9	146154415	AC233893.1_FGT006, GRMZM5G821841_T01	5.47886e-05	0.0554096	-1.78939
116	AD-2017	AD	2017	S9_153775211	153.775	9	153775211	GRMZM2G064005_T01	9.97955e-05	0.0516497	-1.81456	protein_coding
117	AD-2017	AD	2017	S10_134043542	134.044	10	134043542	GRMZM2G126742_T01	7.26307e-05	0.0536422	2.76902	protein_coding
118	ASI-Across	ASI	Across	S1_32091829	32.0918	1	32091829	GRMZM2G152663_T01, GRMZM2G453452_T01	3.77494e-05	0.0593586	-0.232957
119	ASI-Across	ASI	Across	S1_58720611	58.7206	1	58720611	GRMZM2G177532_T02, GRMZM2G177532_T01, GRMZM2G177532_T03	2.83807e-06	0.0759609	0.340758
120	ASI-Across	ASI	Across	S1_68545943	68.5459	1	68545943	GRMZM2G077991_T02, GRMZM2G077991_T03, GRMZM2G077991_T01	8.37335e-05	0.0542288	0.121273
121	ASI-Across	ASI	Across	S1_68546127	68.5461	1	68546127	GRMZM2G077991_T02, GRMZM2G077991_T03, GRMZM2G077991_T01	6.87368e-05	0.0555	0.121104
122	ASI-Across	ASI	Across	S1_71024141	71.0241	1	71024141	GRMZM2G110067_T01	3.77737e-05	0.0593544	0.229659
123	ASI-Across	ASI	Across	S1_206314180	206.314	1	206314180		1.00649e-05	0.0678542	0.457454
124	ASI-Across	ASI	Across	S1_240469014	240.469	1	240469014		3.5316e-05	0.0597874	0.372109
125	ASI-Across	ASI	Across	S2_234796315	234.796	2	234796315	GRMZM2G020805_T01	7.22995e-05	0.0551746	0.224512
126	ASI-Across	ASI	Across	S3_190458279	190.458	3	190458279	GRMZM2G322728_T02, GRMZM2G322728_T01, GRMZM2G322729_T01	1.87705e-05	0.063852	-0.206426
127	ASI-Across	ASI	Across	S5_16320077	16.3201	5	16320077	GRMZM2G134957_T01, GRMZM2G134957_T02	9.71708e-05	0.0532701	-0.184318
128	ASI-Across	ASI	Across	S5_16320079	16.3201	5	16320079	GRMZM2G134957_T01, GRMZM2G134957_T02	7.07578e-05	0.0553134	-0.196915
129	ASI-Across	ASI	Across	S5_23836662	23.8367	5	23836662		8.00215e-05	0.0545209	0.172947
130	ASI-Across	ASI	Across	S5_31906611	31.9066	5	31906611	GRMZM2G046438_T01	3.3725e-05	0.060084	0.102846
131	ASI-Across	ASI	Across	S5_205177154	205.177	5	205177154	GRMZM5G898898_T01	2.89187e-05	0.0610731	0.2344
132	ASI-Across	ASI	Across	S6_156878763	156.879	6	156878763	GRMZM2G078781_T02	3.21664e-05	0.0603884	0.403512
133	ASI-Across	ASI	Across	S8_165273389	165.273	8	165273389	GRMZM2G092817_T01	2.76867e-05	0.0613532	0.182808
134	ASI-Across	ASI	Across	S10_73205880	73.2059	10	73205880	GRMZM2G133512_T01	5.61255e-05	0.0568054	-0.0602691
135	ASI-2018	ASI	2018	S2_7193087	7.19309	2	7193087		5.75265e-06	0.06951	0.426883
136	ASI-2018	ASI	2018	S3_211023899	211.024	3	211023899	GRMZM5G867983_T01, GRMZM2G313718_T01	7.61646e-05	0.0533442	0.500044
137	ASI-2018	ASI	2018	S4_33361597	33.3616	4	33361597	GRMZM2G402653_T01, GRMZM2G402653_T02, GRMZM2G402653_T03	1.92396e-05	0.0619652	0.267989
138	ASI-2018	ASI	2018	S4_158996414	158.996	4	158996414	GRMZM2G026024_T01	9.10632e-05	0.0522239	-0.146296
139	ASI-2018	ASI	2018	S5_16320077	16.3201	5	16320077	GRMZM2G134957_T01, GRMZM2G134957_T02	9.77771e-05	0.0517778	-0.164353
140	ASI-2018	ASI	2018	S5_16320079	16.3201	5	16320079	GRMZM2G134957_T01, GRMZM2G134957_T02	5.2407e-05	0.0556882	-0.184321
141	ASI-2018	ASI	2018	S5_76729287	76.7293	5	76729287	GRMZM2G398559_T01	1.10944e-05	0.0654085	0.230209
142	ASI-2018	ASI	2018	S5_76936003	76.936	5	76936003	GRMZM2G399858_T01, GRMZM2G399858_T02	5.48866e-05	0.0553984	0.220628
143	ASI-2018	ASI	2018	S6_7156722	7.15672	6	7156722	GRMZM2G057026_T01	1.59783e-05	0.0631274	0.217937
144	ASI-2018	ASI	2018	S6_58444848	58.4448	6	58444848		8.94726e-05	0.0523344	-0.279429
145	ASI-2018	ASI	2018	S6_71015469	71.0155	6	71015469	GRMZM2G152041_T01	9.32016e-05	0.0520783	0.219304
146	ASI-2018	ASI	2018	S6_76508642	76.5086	6	76508642		9.44271e-05	0.0519964	0.243952
147	ASI-2018	ASI	2018	S6_130132020	130.132	6	130132020	GRMZM5G886257_T01	7.64238e-05	0.0533229	-0.26372
148	ASI-2018	ASI	2018	S6_156878763	156.879	6	156878763	GRMZM2G078781_T02	1.93615e-05	0.0619256	0.491872
149	ASI-2018	ASI	2018	S6_159562212	159.562	6	159562212		7.13374e-07	0.0824871	0.486414
150	ASI-2018	ASI	2018	S7_31520151	31.5202	7	31520151	GRMZM2G438871_T01	8.13879e-05	0.0529283	0.555118
151	ASI-2018	ASI	2018	S7_108844203	108.844	7	108844203	GRMZM2G126507_T02, GRMZM2G126507_T01	8.69955e-05	0.0525105	-0.191167
152	ASI-2018	ASI	2018	S7_172947914	172.948	7	172947914	GRMZM5G807560_T01	2.76055e-05	0.0597048	0.26036
153	ASI-2018	ASI	2018	S8_167267634	167.268	8	167267634		7.40655e-05	0.0535195	-0.253561
154	ASI-2017	ASI	2017	S1_52393720	52.3937	1	52393720		1.47897e-05	0.0636109	1.76093
155	ASI-2017	ASI	2017	S1_58720611	58.7206	1	58720611	GRMZM2G177532_T02, GRMZM2G177532_T01, GRMZM2G177532_T03	3.0888e-05	0.0590011	1.396
156	ASI-2017	ASI	2017	S1_71024141	71.0241	1	71024141	GRMZM2G110067_T01	6.61691e-05	0.0542264	1.13079
157	ASI-2017	ASI	2017	S1_80320978	80.321	1	80320978	GRMZM2G093962_T05, GRMZM2G093962_T04, GRMZM2G093962_T02, GRMZM2G093962_T01, GRMZM2G093962_T03	6.93617e-05	0.0539309	0.887397
158	ASI-2017	ASI	2017	S1_240469014	240.469	1	240469014		5.92522e-05	0.0549186	1.77333
159	ASI-2017	ASI	2017	S2_48147209	48.1472	2	48147209	GRMZM2G053111_T01	6.38523e-05	0.0544498	0.651658
160	ASI-2017	ASI	2017	S2_210032585	210.033	2	210032585	GRMZM2G043154_T01	1.19057e-05	0.0649673	1.60967
161	ASI-2017	ASI	2017	S2_234796315	234.796	2	234796315	GRMZM2G020805_T01	3.43344e-05	0.0583384	1.25953
162	ASI-2017	ASI	2017	S3_168525039	168.525	3	168525039	GRMZM2G086845_T02, GRMZM2G086845_T01	4.13051e-05	0.0571803	1.29429
163	ASI-2017	ASI	2017	S3_218189554	218.19	3	218189554		7.2897e-05	0.0536192	1.02838
164	ASI-2017	ASI	2017	S4_16843870	16.8439	4	16843870	GRMZM2G117609_T01	7.79902e-06	0.0676104	2.7844
165	ASI-2017	ASI	2017	S4_25984893	25.9849	4	25984893	GRMZM2G026459_T03, GRMZM2G026459_T04, GRMZM2G026459_T01	2.97634e-05	0.0592334	1.25615
166	ASI-2017	ASI	2017	S4_160021520	160.022	4	160021520		8.50564e-05	0.0526518	1.74229
167	ASI-2017	ASI	2017	S4_194911856	194.912	4	194911856	GRMZM2G038479_T01	9.69602e-05	0.0518304	0.72337
168	ASI-2017	ASI	2017	S4_196824243	196.824	4	196824243	GRMZM2G343828_T01, GRMZM2G343828_T02, GRMZM2G343828_T03	6.19079e-05	0.0546437	0.726984
169	ASI-2017	ASI	2017	S5_7523543	7.52354	5	7523543	GRMZM2G132121_T02, GRMZM2G132121_T03, GRMZM2G132121_T01	9.22083e-05	0.0521455	0.707692
170	ASI-2017	ASI	2017	S5_159913392	159.913	5	159913392	GRMZM2G028677_T01	8.02999e-06	0.0674281	1.17189
171	ASI-2017	ASI	2017	S5_204803852	204.804	5	204803852	GRMZM2G075136_T01	9.64302e-05	0.0518648	1.22631
172	ASI-2017	ASI	2017	S5_205177154	205.177	5	205177154	GRMZM5G898898_T01	2.55032e-05	0.0602008	1.07733
173	ASI-2017	ASI	2017	S5_205181453	205.181	5	205181453		6.08739e-06	0.0691571	1.31298
174	ASI-2017	ASI	2017	S5_205535188	205.535	5	205535188	GRMZM2G151204_T01	1.29633e-05	0.0644352	1.23437
175	ASI-2017	ASI	2017	S6_147900706	147.901	6	147900706		9.95438e-05	0.0516655	0.633957
176	ASI-2017	ASI	2017	S10_1731001	1.731	10	1731001	GRMZM2G130062_T01	8.24794e-05	0.0528448	1.55906
177	PH-Across	PH	Across	S1_80662271	80.6623	1	80662271	GRMZM2G087243_T01, GRMZM2G087243_T03, GRMZM2G389194_T01, GRMZM2G087243_T04, GRMZM2G087243_T05	8.97204e-05	0.053784	-3.42892
178	PH-Across	PH	Across	S1_80662661	80.6627	1	80662661	GRMZM2G087243_T01, GRMZM2G087243_T03, GRMZM2G389194_T01, GRMZM2G087243_T04, GRMZM2G087243_T05	1.51742e-05	0.0652186	-3.40549
179	PH-Across	PH	Across	S2_188416495	188.416	2	188416495	GRMZM2G137558_T01	5.39909e-06	0.0718467	3.80108
180	PH-Across	PH	Across	S3_153769448	153.769	3	153769448		3.57348e-05	0.0597115	-6.11506
181	PH-Across	PH	Across	S3_153769928	153.77	3	153769928		7.07906e-05	0.0553104	-5.55071
182	PH-Across	PH	Across	S6_147221248	147.221	6	147221248		7.38269e-05	0.0550399	0.408342
183	PH-Across	PH	Across	S7_9363821	9.36382	7	9363821	GRMZM2G456059_T01	6.62868e-05	0.0557338	1.85587
184	PH-Across	PH	Across	S7_9367850	9.36785	7	9367850		7.79841e-05	0.0546871	0.53514
185	PH-Across	PH	Across	S7_153450970	153.451	7	153450970	GRMZM2G180082_T01	5.73844e-05	0.0566625	2.82895
186	PH-Across	PH	Across	S8_162784156	162.784	8	162784156		9.55971e-05	0.0533753	-2.14874
187	PH-Across	PH	Across	S8_172989477	172.989	8	172989477	GRMZM2G027016_T01	2.7605e-05	0.0613722	-4.64301
188	PH-Across	PH	Across	S10_147245009	147.245	10	147245009	GRMZM2G107620_T01, GRMZM2G107620_T04, GRMZM2G107620_T02, GRMZM2G107620_T03	6.1057e-05	0.056263	-1.90137
189	PH-2018	PH	2018	S2_189087809	189.088	2	189087809	AC233861.1_FGT001	3.69693e-05	0.0578752	3.44672
190	PH-2018	PH	2018	S3_2942264	2.94226	3	2942264	GRMZM2G061018_T02, GRMZM2G061018_T01	3.24966e-05	0.0586831	1.14047
191	PH-2018	PH	2018	S3_153769448	153.769	3	153769448		1.49367e-05	0.0635491	-5.29353
192	PH-2018	PH	2018	S3_153769928	153.77	3	153769928		2.86876e-05	0.059464	-4.8828
193	PH-2018	PH	2018	S6_97340172	97.3402	6	97340172	GRMZM2G018105_T02, GRMZM2G018105_T01, GRMZM2G018105_T03	9.22462e-05	0.052143	5.4187
194	PH-2018	PH	2018	S6_130031239	130.031	6	130031239		8.7558e-05	0.0524701	-2.37842
195	PH-2018	PH	2018	S7_4826859	4.82686	7	4826859	GRMZM2G167892_T03, GRMZM2G167892_T01, GRMZM2G167892_T02, GRMZM5G874391_T01	5.90883e-05	0.054936	1.49855
196	PH-2018	PH	2018	S8_20526402	20.5264	8	20526402		9.14649e-05	0.0521963	-1.55576
197	PH-2018	PH	2018	S8_138860746	138.861	8	138860746		6.67923e-05	0.0541676	-3.09114
198	PH-2018	PH	2018	S8_162784156	162.784	8	162784156		7.4832e-05	0.0534549	-1.92791
199	PH-2018	PH	2018	S9_23528742	23.5287	9	23528742	GRMZM2G396553_T01	8.93275e-05	0.0523446	-3.25249
200	PH-2017	PH	2017	S1_80662661	80.6627	1	80662661	GRMZM2G087243_T01, GRMZM2G087243_T03, GRMZM2G389194_T01, GRMZM2G087243_T04, GRMZM2G087243_T05	9.29419e-05	0.0520958	-4.64895
201	PH-2017	PH	2017	S2_140326232	140.326	2	140326232	GRMZM5G821024_T01, GRMZM5G821024_T02	4.08281e-05	0.057253	-4.5599
202	PH-2017	PH	2017	S2_188416495	188.416	2	188416495	GRMZM2G137558_T01	3.99208e-05	0.0573939	4.97171
203	PH-2017	PH	2017	S2_217345339	217.345	2	217345339	GRMZM2G003409_T02, GRMZM2G003409_T01	7.92821e-05	0.0530927	3.89947
204	PH-2017	PH	2017	S3_1591296	1.5913	3	1591296		8.12142e-05	0.0529417	-4.86211
205	PH-2017	PH	2017	S3_2944480	2.94448	3	2944480	GRMZM2G061018_T01	5.06424e-05	0.0559029	5.40803
206	PH-2017	PH	2017	S3_19778842	19.7788	3	19778842		3.4534e-05	0.0583021	6.13179
207	PH-2017	PH	2017	S4_211045950	211.046	4	211045950	GRMZM2G149739_T01	2.24556e-05	0.0609977	4.9226
208	PH-2017	PH	2017	S5_216088697	216.089	5	216088697	GRMZM2G087924_T02	5.98534e-05	0.0548553	-2.94626
209	PH-2017	PH	2017	S6_39564314	39.5643	6	39564314	GRMZM2G176455_T01, GRMZM2G176455_T04, GRMZM2G176455_T03, GRMZM2G176455_T02	2.43114e-05	0.0605005	4.87352
210	PH-2017	PH	2017	S7_100803155	100.803	7	100803155	GRMZM2G176759_T01	2.90523e-05	0.0593849	4.43271
211	PH-2017	PH	2017	S9_11749657	11.7497	9	11749657	GRMZM2G177098_T01, GRMZM2G177098_T02	1.44937e-05	0.0637374	5.31253
212	KN-2018	KN	2018	S2_41895131	41.8951	2	41895131		3.73707e-05	0.0578075	241.225
213	KN-2018	KN	2018	S2_41895147	41.8951	2	41895147		3.73707e-05	0.0578075	241.154
214	KN-2018	KN	2018	S2_157237064	157.237	2	157237064	GRMZM2G166245_T01, GRMZM2G166245_T02	8.70229e-05	0.0525085	-299.078
215	KN-2018	KN	2018	S3_127518652	127.519	3	127518652		7.08269e-05	0.0537998	-334.563
216	KN-2018	KN	2018	S3_127518662	127.519	3	127518662		3.85363e-05	0.057615	-345.448
217	KN-2018	KN	2018	S4_83198559	83.1986	4	83198559	GRMZM2G168002_T04, GRMZM2G168002_T01, GRMZM2G168002_T03, GRMZM2G168002_T02	8.3031e-05	0.052803	-225.209
218	KN-2018	KN	2018	S5_15324004	15.324	5	15324004	GRMZM2G161418_T01, GRMZM2G161418_T02, GRMZM2G161418_T04, GRMZM2G161418_T03, GRMZM2G161418_T08, GRMZM2G161418_T07, GRMZM2G161418_T06, GRMZM2G161418_T05	9.21364e-05	0.0521504	-167.508
219	KN-2018	KN	2018	S5_22599062	22.5991	5	22599062	GRMZM2G002859_T01, GRMZM2G002859_T03, GRMZM2G002859_T02	2.08602e-05	0.061459	141.259
220	KN-2018	KN	2018	S6_87402488	87.4025	6	87402488	GRMZM2G114337_T01	3.22596e-05	0.0587289	243.3
221	KN-2018	KN	2018	S6_157029418	157.029	6	157029418		6.79712e-05	0.0540579	-154.775
222	KN-2018	KN	2018	S9_151302911	151.303	9	151302911	GRMZM2G178916_T03	9.8501e-05	0.0517315	-172.32
223	KN-2018	KN	2018	S9_151302923	151.303	9	151302923	GRMZM2G178916_T03	9.8501e-05	0.0517315	-172.32
224	CL-2018	CL	2018	S1_6533372	6.53337	1	6533372	GRMZM5G887276_T04, GRMZM5G887276_T03, GRMZM5G887276_T02	3.90596e-05	0.0575305	0.00987464
225	CL-2018	CL	2018	S1_12520079	12.5201	1	12520079	GRMZM2G165972_T04, GRMZM2G165972_T03, GRMZM2G165972_T02, GRMZM2G165972_T01	9.14636e-05	0.0521964	0.129934
226	CL-2018	CL	2018	S1_60091076	60.0911	1	60091076		8.33094e-05	0.052782	0.0696991
227	CL-2018	CL	2018	S2_39426887	39.4269	2	39426887	GRMZM2G330430_T01, GRMZM2G330430_T02	3.2864e-05	0.0586126	-0.0605979
228	CL-2018	CL	2018	S2_41245531	41.2455	2	41245531	GRMZM2G394321_T01	5.61422e-05	0.0552566	0.069072
229	CL-2018	CL	2018	S2_108143505	108.144	2	108143505		5.43975e-05	0.0554545	-0.145148
230	CL-2018	CL	2018	S3_54175702	54.1757	3	54175702	GRMZM2G147791_T01	5.06252e-05	0.055905	-0.0774708
231	CL-2018	CL	2018	S3_196566597	196.567	3	196566597		8.73768e-05	0.0524831	0.0954263
232	CL-2018	CL	2018	S4_178381544	178.382	4	178381544		6.36401e-05	0.0544707	-0.0753815
233	CL-2018	CL	2018	S5_3834681	3.83468	5	3834681	GRMZM5G883250_T01	6.88754e-05	0.053975	-0.0673509
234	CL-2018	CL	2018	S6_3869692	3.86969	6	3869692	GRMZM2G030325_T01	1.1111e-07	0.0939562	0.111511
235	CL-2018	CL	2018	S7_143414631	143.415	7	143414631		9.56433e-06	0.0663359	-0.0476173
236	CL-2018	CL	2018	S7_168994991	168.995	7	168994991	GRMZM2G150731_T01	4.27908e-05	0.0569588	0.0531778
237	CL-2018	CL	2018	S9_138425015	138.425	9	138425015	GRMZM2G054300_T05, GRMZM2G054300_T01, GRMZM2G054300_T02, GRMZM2G054300_T03, GRMZM2G054300_T04, GRMZM2G054187_T01	9.80792e-05	0.0517584	-0.0796341
238	CL-2018	CL	2018	S9_147612045	147.612	9	147612045	GRMZM5G838403_T01	9.46656e-05	0.0519806	-0.0337409
239	CL-2018	CL	2018	S9_147629104	147.629	9	147629104	GRMZM2G403944_T01	1.97091e-05	0.0618143	0.0792106
240	CL-2018	CL	2018	S9_149245965	149.246	9	149245965	GRMZM2G004466_T02, GRMZM2G004466_T01	2.58401e-05	0.0601187	0.0750002
241	CL-2018	CL	2018	S10_10803013	10.803	10	10803013	GRMZM2G005848_T01	8.48574e-06	0.0670833	0.111719
242	CL-2018	CL	2018	S10_59877657	59.8777	10	59877657		9.66197e-05	0.0518525	0.0910703
243	CL-2018	CL	2018	S10_73283146	73.2831	10	73283146	GRMZM2G407495_T01	4.51407e-05	0.0566237	0.128766
244	CL-2018	CL	2018	S10_76586897	76.5869	10	76586897	GRMZM2G042895_T01	1.36373e-05	0.0641183	0.113497
245	CL-2018	CL	2018	S10_124732432	124.732	10	124732432	GRMZM2G021482_T01	6.47437e-05	0.0543629	0.0784421
246	CL-2018	CL	2018	S2_144046894	144.047	2	144046894	GRMZM2G116812_T01	3.7391e-05	0.0578041	-0.108506
247	CG-2018	CG	2018	S3_184817798	184.818	3	184817798	GRMZM2G059562_T01	7.1702e-05	0.0537228	-0.0913389
248	CG-2018	CG	2018	S3_191840050	191.84	3	191840050	GRMZM5G817173_T03	5.85536e-05	0.054993	0.228271
249	CG-2018	CG	2018	S3_192022022	192.022	3	192022022	GRMZM2G047262_T01	2.85517e-06	0.0738757	-0.191456
250	CG-2018	CG	2018	S4_837716	0.837716	4	837716	GRMZM2G073779_T01	8.72815e-05	0.0524899	-0.163727
251	CG-2018	CG	2018	S5_18623150	18.6231	5	18623150	GRMZM2G363437_T02, GRMZM2G363437_T01	4.27852e-05	0.0569596	0.260334
252	CG-2018	CG	2018	S5_194163064	194.163	5	194163064	GRMZM2G090595_T01	5.87435e-05	0.0549727	0.284286
253	CG-2018	CG	2018	S5_198208124	198.208	5	198208124	GRMZM2G058943_T01	1.19195e-05	0.0649601	-0.193336
254	CG-2018	CG	2018	S5_199166363	199.166	5	199166363	GRMZM2G442920_T01, GRMZM2G141975_T01	6.8582e-05	0.0540018	-0.0660698
255	CG-2018	CG	2018	S5_199167149	199.167	5	199167149	GRMZM2G141975_T01	7.56089e-05	0.0533902	0.217888
256	CG-2018	CG	2018	S9_116680152	116.68	9	116680152	GRMZM2G073260_T01	8.59511e-05	0.0525862	0.0637822
257	CG-2018	CG	2018	S9_151287117	151.287	9	151287117	GRMZM2G178847_T03, GRMZM2G178847_T02, GRMZM2G178847_T01, GRMZM2G178847_T05	8.24853e-06	0.0672604	-0.19752
258	CG-2018	CG	2018	S10_117475838	117.476	10	117475838	GRMZM2G039399_T01	8.44397e-05	0.0526975	0.266994
259	CG-2018	CG	2018	S10_131880085	131.88	10	131880085	GRMZM2G400570_T01	4.40456e-05	0.0567777	0.200309

## Sheet: Supple table-2
Supplementary table 2: Marker trait assocaitons common between individual year and across year for each triat.
S.No	Trait*	Year	Marker	Position in Mb	Chrom No	Position	Gene Name	P-Value	Proportion of Variance Explained	Effect	Putative biological functions
1	AD	2018, Across	S1_250893506	250.894	1	250893506	GRMZM2G014392_T01	7.49369e-06	0.0697462	1.07129	vp14
2	AD	2018, Across	S2_208999109	208.999	2	208999109		1.58944e-05	0.0649207	1.69776
3	AD	2018, Across	S2_209496839	209.497	2	209496839	GRMZM5G873123_T02, GRMZM5G873123_T01	9.43367e-06	0.0682697	2.12625	protein_coding
4	AD	2017, Across	S2_211029206	211.029	2	211029206	GRMZM2G101142_T01	1.90901e-05	0.0637435	2.0191	protein_coding
5	AD	2017, Across	S3_206753164	206.753	3	206753164		3.81258e-05	0.0592947	1.63671
6	AD	2018, Across	S4_219994248	219.994	4	219994248	GRMZM2G051185_T01	7.3025e-05	0.0551103	0.50199	protein_coding
7	AD	2017, Across	S4_235453550	235.454	4	235453550	GRMZM2G339909_T01	8.09887e-06	0.0692482	-2.45014	protein_coding
8	AD	2017, Across	S5_163119125	163.119	5	163119125	GRMZM2G043602_T01, GRMZM2G043602_T03, GRMZM2G043602_T02	6.7533e-05	0.0556138	-1.27744	protein_coding
9	AD	2017, Across	S5_212245497	212.245	5	212245497	GRMZM2G098058_T01, GRMZM2G098058_T02, GRMZM2G098058_T03	8.90798e-05	0.0538301	-4.92207	protein_coding
10	AD	2017, Across	S5_69435496	69.4355	5	69435496	GRMZM2G117012_T01	2.37799e-05	0.0623314	-1.21186	protein_coding
11	AD	2017, Across	S5_69435513	69.4355	5	69435513	GRMZM2G117012_T01	2.67361e-05	0.0615779	-1.26245
12	AD	2017, Across	S5_69435514	69.4355	5	69435514	GRMZM2G117012_T01	2.67361e-05	0.0615779	-1.26245
13	AD	2018, Across	S8_79188751	79.1888	8	79188751	GRMZM2G012901_T01	8.3819e-05	0.0542223	0.583103	protein_coding
14	AD	2017, Across	S9_146154415	146.154	9	146154415	AC233893.1_FGT006, GRMZM5G821841_T01	2.254e-05	0.0626757	-1.13214	protein_coding
15	AD	2017, Across	S9_153775211	153.775	9	153775211	GRMZM2G064005_T01	8.26682e-05	0.0543113	-0.982198	protein_coding
16	ASI	2017, Across	S1_240469014	240.469	1	240469014		3.5316e-05	0.0597874	0.372109
17	ASI	2017, Across	S1_58720611	58.7206	1	58720611	GRMZM2G177532_T02, GRMZM2G177532_T01, GRMZM2G177532_T03	2.83807e-06	0.0759609	0.340758
18	ASI	2017, Across	S1_71024141	71.0241	1	71024141	GRMZM2G110067_T01	3.77737e-05	0.0593544	0.229659
19	ASI	2017, Across	S2_234796315	234.796	2	234796315	GRMZM2G020805_T01	7.22995e-05	0.0551746	0.224512
20	ASI	2018, Across	S5_16320077	16.3201	5	16320077	GRMZM2G134957_T01, GRMZM2G134957_T02	9.71708e-05	0.0532701	-0.184318
21	ASI	2018, Across	S5_16320079	16.3201	5	16320079	GRMZM2G134957_T01, GRMZM2G134957_T02	7.07578e-05	0.0553134	-0.196915
22	ASI	2017, Across	S5_205177154	205.177	5	205177154	GRMZM5G898898_T01	2.89187e-05	0.0610731	0.2344
23	ASI	2018, Across	S6_156878763	156.879	6	156878763	GRMZM2G078781_T02	3.21664e-05	0.0603884	0.403512
24	PH	2017, Across	S1_80662661	80.6627	1	80662661	GRMZM2G087243_T01, GRMZM2G087243_T03, GRMZM2G389194_T01, GRMZM2G087243_T04, GRMZM2G087243_T05	1.51742e-05	0.0652186	-3.40549
25	PH	2017, Across	S2_188416495	188.416	2	188416495	GRMZM2G137558_T01	5.39909e-06	0.0718467	3.80108
26	PH	2018, Across	S3_153769448	153.769	3	153769448		3.57348e-05	0.0597115	-6.11506
27	PH	2018, Across	S3_153769928	153.77	3	153769928		7.07906e-05	0.0553104	-5.55071
28	PH	2018, Across	S8_162784156	162.784	8	162784156		9.55971e-05	0.0533753	-2.14874
* For the triat Grain yield (GY) NO common marker trait association was found between individual and across year.
