# Supplementary material for: Genomic Regions Associated With Salinity Stress Tolerance in Tropical Maize (Zea Mays L.)
Source: Front Plant Sci. 2022 May 31;13:869270. doi: 10.3389/fpls.2022.869270 (PMC9194767; doi:10.3389/fpls.2022.869270)
Supplement: Supplementary file 3 [file Table_2.XLSX]

## Sheet: Supple table-1
Supplementary table 1: Marker trait assocaiton for the traits under salinity stress
S.No	Triat and year	Trait	Year	Marker	Chrom No	Position in base pairs	P-Value	Proportion of Variance Explained	Effect	Gene Name	Biological function
1	GY-Across	GY	Across	S1_202305536	1	202305536	5.23397e-05	0.0556963	0.0821549
2	GY-Across	GY	Across	S1_281069408	1	281069408	3.1379e-05	0.0589023	-0.0626338	GRMZM5G843914_T01
3	GY-Across	GY	Across	S1_281069409	1	281069409	8.36385e-05	0.0527573	-0.0606861	GRMZM5G843914_T01
4	GY-Across	GY	Across	S2_39327598	2	39327598	8.88187e-06	0.0667983	-0.0341716	GRMZM2G155491_T01
5	GY-Across	GY	Across	S4_83197497	4	83197497	4.26949e-06	0.0713694	-0.0415047	GRMZM2G168002_T05	glk49 - G2-like-transcription factor 49
6	GY-Across	GY	Across	S4_83197515	4	83197515	2.82459e-05	0.0595612	-0.0355689	GRMZM2G168002_T05
7	GY-Across	GY	Across	S4_83197875	4	83197875	2.76463e-06	0.0740763	-0.0462124	GRMZM2G168002_T05
8	GY-Across	GY	Across	S4_83197879	4	83197879	3.33156e-05	0.0585272	-0.0409812	GRMZM2G168002_T05
9	GY-Across	GY	Across	S4_83197886	4	83197886	2.87333e-05	0.059454	-0.0394496	GRMZM2G168002_T05
10	GY-Across	GY	Across	S4_83197887	4	83197887	2.87333e-05	0.059454	-0.0394496	GRMZM2G168002_T05
11	GY-Across	GY	Across	S5_20794643	5	20794643	3.73421e-05	0.0578123	0.0158554	GRMZM2G090576_T01
12	GY-Across	GY	Across	S7_86024819	7	86024819	2.47646e-05	0.0603849	-0.0208482
13	GY-Across	GY	Across	S7_86024907	7	86024907	4.77751e-05	0.0562682	0.0211045
14	GY-Across	GY	Across	S9_5876850	9	5876850	5.87994e-05	0.0549667	-0.0635298
15	GY-Across	GY	Across	S10_128699484	10	128699484	5.77906e-05	0.0550752	-0.033319	GRMZM2G071360_T02
16	GY-Across	GY	Across	S10_128699515	10	128699515	5.77906e-05	0.0550752	-0.033319	GRMZM2G071360_T02
17	GY-2018	GY	2018	S1_85990034	1	85990034	9.28457e-05	0.0521023	-0.299055	GRMZM2G453832_T01	Mgt-6 magnesium transporter6
18	GY-2018	GY	2018	S3_187169134	3	187169134	6.97922e-05	0.0538921	-0.177959	GRMZM2G036099_T01	Cupin
19	GY-2018	GY	2018	S3_210749183	3	210749183	2.0066e-05	0.0617019	0.439422	GRMZM2G024448_T01	Oxidation reduction process
20	GY-2018	GY	2018	S4_190375543	4	190375543	7.1089e-05	0.0537767	-0.0441627	GRMZM2G013271_T01	ofp22 - OVATE-transcription factor 22
21	GY-2018	GY	2018	S5_166934277	5	166934277	5.88102e-05	0.0549655	-0.0407372	GRMZM2G177356_T01	protein_coding
22	GY-2018	GY	2018	S5_205033670	5	205033670	3.2472e-05	0.0586878	-0.151501	GRMZM2G375762_T01	Dynein light chain
23	GY-2018	GY	2018	S6_82015505	6	82015505	2.06747e-05	0.0615149	-0.429299
24	GY-2018	GY	2018	S6_87402488	6	87402488	8.32719e-05	0.0527848	0.384301	GRMZM2G114337_T01	Core-2/I-branching beta-16-N-acetylglucosaminyltransferase family protein
25	GY-2018	GY	2018	S6_157029254	6	157029254	4.48852e-06	0.0710575	-0.12401
26	GY-2018	GY	2018	S6_157029264	6	157029264	1.97865e-05	0.0617898	-0.117723
27	GY-2018	GY	2018	S6_157029418	6	157029418	3.28777e-05	0.05861	-0.152539
28	GY-2018	GY	2018	S7_15827091	7	15827091	7.6743e-05	0.0532968	-0.255838	GRMZM2G478965_T01	(ereb166 - AP2-EREBP-transcription factor 166)
29	GY-2018	GY	2018	S8_159549662	8	159549662	3.54619e-05	0.058136	-0.230923
30	GY-2018	GY	2018	S8_159549690	8	159549690	5.59171e-05	0.0552818	-0.22575
31	GY-2018	GY	2018	S9_12106484	9	12106484	3.43683e-05	0.0583322	-0.207716	GRMZM2G467169_T01
32	GY-2018	GY	2018	S9_12109189	9	12109189	7.24351e-05	0.0536591	0.214176	GRMZM2G467169_T01
33	GY-2017	GY	2017	S1_187436342	1	187436342	5.17656e-05	0.0557654	0.178255
34	GY-2017	GY	2017	S1_276683126	1	276683126	7.90302e-06	0.0675276	-0.0614924	GRMZM2G177867_T02	protein_coding
35	GY-2017	GY	2017	S1_276683128	1	276683128	6.65658e-06	0.0685992	-0.0865581	GRMZM2G177867_T02
36	GY-2017	GY	2017	S2_38705331	2	38705331	2.6474e-06	0.074346	-0.240788	GRMZM2G124096_T01	protein_coding
37	GY-2017	GY	2017	S2_38705604	2	38705604	8.31911e-05	0.0527909	-0.236226	GRMZM2G124096_T01
38	GY-2017	GY	2017	S2_38705733	2	38705733	3.11397e-06	0.0733355	-0.229426	GRMZM2G124096_T01
39	GY-2017	GY	2017	S2_39295432	2	39295432	1.18074e-05	0.0650191	-0.205073
40	GY-2017	GY	2017	S2_58759336	2	58759336	7.27249e-05	0.053634	0.0366377
41	GY-2017	GY	2017	S3_151971414	3	151971414	6.34446e-05	0.05449	0.21664	GRMZM2G065585_T01	glucan endo-1,3-beta-glucosidase homolog1
42	GY-2017	GY	2017	S5_22884763	5	22884763	7.45327e-05	0.0534801	0.259682
43	GY-2017	GY	2017	S5_69435496	5	69435496	1.31986e-05	0.0643228	0.230751	GRMZM2G117012_T01	protein_coding
44	GY-2017	GY	2017	S5_69435513	5	69435513	3.50377e-05	0.0582114	0.219838	GRMZM2G117012_T01
45	GY-2017	GY	2017	S5_69435514	5	69435514	3.50377e-05	0.0582114	0.219838	GRMZM2G117012_T01
46	GY-2017	GY	2017	S5_164855465	5	164855465	6.4132e-05	0.0544224	0.16161	GRMZM5G872392_T03	sweet-15b
47	GY-2017	GY	2017	S5_168666071	5	168666071	7.83065e-05	0.0531703	0.195629	GRMZM2G004715_T01	protein_coding
48	GY-2017	GY	2017	S5_191376709	5	191376709	2.66187e-06	0.0743121	-0.16795	GRMZM2G057386_T01	ereb107 - AP2-EREBP-transcription factor 107
49	GY-2017	GY	2017	S5_209867036	5	209867036	9.29464e-05	0.0520955	-0.150849	GRMZM2G103128_T01	Fucosyltransferase
50	GY-2017	GY	2017	S7_172512783	7	172512783	1.54889e-05	0.063322	-0.125323	GRMZM2G414475_T01	protein_coding
51	GY-2017	GY	2017	S8_32895805	8	32895805	2.00712e-05	0.0617003	-0.0758522
52	GY-2017	GY	2017	S8_35231586	8	35231586	7.87655e-05	0.0531337	0.140769
53	GY-2017	GY	2017	S8_35447245	8	35447245	2.29539e-05	0.0608603	0.211108
54	GY-2017	GY	2017	S8_136133964	8	136133964	6.42991e-05	0.0544061	0.200468	GRMZM2G100229_T01	protein_coding
55	GY-2017	GY	2017	S8_136133978	8	136133978	6.42991e-05	0.0544061	0.200468	GRMZM2G100229_T01
56	GY-2017	GY	2017	S8_136134503	8	136134503	3.45689e-05	0.0582958	0.196335	GRMZM2G100229_T01
57	GY-2017	GY	2017	S8_136138158	8	136138158	3.021e-05	0.0591401	0.152151	GRMZM2G100229_T01
58	GY-2017	GY	2017	S8_136413523	8	136413523	1.33704e-05	0.0642419	0.173236	AC207342.3_FGT008
59	GY-2017	GY	2017	S8_136413525	8	136413525	2.41798e-06	0.07491	0.222953	AC207342.3_FGT008
60	GY-2017	GY	2017	S8_136413526	8	136413526	2.41798e-06	0.07491	0.222953	AC207342.3_FGT008
61	AD-Across	AD	Across	S1_250092554	1	250092554	3.5646e-05	0.0597275	-1.69718	GRMZM2G065498_T01
62	AD-Across	AD	Across	S1_250893506	1	250893506	7.49369e-06	0.0697462	1.07129	GRMZM2G014392_T01	vp14
63	AD-Across	AD	Across	S1_300272491	1	300272491	9.97266e-05	0.0531028	0.0641099	GRMZM2G036169_T01	lug3 - leunig-related3
64	AD-Across	AD	Across	S2_75423469	2	75423469	9.3575e-05	0.053513	-1.8714	AC197056.3_FGT005
65	AD-Across	AD	Across	S2_208999109	2	208999109	1.58944e-05	0.0649207	1.69776
66	AD-Across	AD	Across	S2_209496839	2	209496839	9.43367e-06	0.0682697	2.12625	GRMZM5G873123_T02	protein_coding
67	AD-Across	AD	Across	S2_211029206	2	211029206	1.90901e-05	0.0637435	2.0191	GRMZM2G101142_T01	protein_coding
68	AD-Across	AD	Across	S3_122496340	3	122496340	5.70488e-05	0.0567003	-3.82518
69	AD-Across	AD	Across	S3_206753164	3	206753164	3.81258e-05	0.0592947	1.63671
70	AD-Across	AD	Across	S4_214528333	4	214528333	4.18337e-05	0.0586974	1.23174	GRMZM2G000576_T01	protein_coding
71	AD-Across	AD	Across	S4_219994248	4	219994248	7.3025e-05	0.0551103	0.50199	GRMZM2G051185_T01	protein_coding
72	AD-Across	AD	Across	S4_235453550	4	235453550	8.09887e-06	0.0692482	-2.45014	GRMZM2G339909_T01	protein_coding
73	AD-Across	AD	Across	S5_69435496	5	69435496	2.37799e-05	0.0623314	-1.21186	GRMZM2G117012_T01	protein_coding
74	AD-Across	AD	Across	S5_69435513	5	69435513	2.67361e-05	0.0615779	-1.26245	GRMZM2G117012_T01
75	AD-Across	AD	Across	S5_69435514	5	69435514	2.67361e-05	0.0615779	-1.26245	GRMZM2G117012_T01
76	AD-Across	AD	Across	S5_163119125	5	163119125	6.7533e-05	0.0556138	-1.27744	GRMZM2G043602_T01	protein_coding
77	AD-Across	AD	Across	S5_165071094	5	165071094	8.8206e-05	0.0538936	2.37441	GRMZM2G147335_T03	protein_coding
78	AD-Across	AD	Across	S5_165071180	5	165071180	8.8206e-05	0.0538936	2.36811	GRMZM2G147335_T03
79	AD-Across	AD	Across	S5_212245497	5	212245497	8.90798e-05	0.0538301	-4.92207	GRMZM2G098058_T01	protein_coding
80	AD-Across	AD	Across	S6_27336376	6	27336376	8.82315e-05	0.0538918	2.22718	GRMZM2G075286_T01	protein_coding
81	AD-Across	AD	Across	S6_157569199	6	157569199	5.84336e-05	0.0565459	2.36783	GRMZM2G305115_T01	crt3 - Calreticulin3
82	AD-Across	AD	Across	S6_157569204	6	157569204	5.84336e-05	0.0565459	2.36783	GRMZM2G305115_T01
83	AD-Across	AD	Across	S6_157569206	6	157569206	5.84336e-05	0.0565459	2.36783	GRMZM2G305115_T01
84	AD-Across	AD	Across	S8_79188751	8	79188751	8.3819e-05	0.0542223	0.583103	GRMZM2G012901_T01	protein_coding
85	AD-Across	AD	Across	S9_141848482	9	141848482	5.07181e-05	0.0574577	1.32369
86	AD-Across	AD	Across	S9_146154415	9	146154415	2.254e-05	0.0626757	-1.13214	AC233893.1_FGT006	protein_coding
87	AD-Across	AD	Across	S9_153775211	9	153775211	8.26682e-05	0.0543113	-0.982198	GRMZM2G064005_T01	protein_coding
88	AD-2018	AD	2018	S1_250893506	1	250893506	3.39178e-05	0.0584149	0.843098	GRMZM2G014392_T01	vp14
89	AD-2018	AD	2018	S1_290109325	1	290109325	8.60057e-05	0.0525822	-0.198348	GRMZM2G062377_T01	protein_coding
90	AD-2018	AD	2018	S2_193843706	2	193843706	6.34618e-05	0.0544883	-2.58755	GRMZM2G170253_T01	protein_coding
91	AD-2018	AD	2018	S2_194355749	2	194355749	3.67198e-05	0.0579176	-2.29002	AC199782.5_FGT003
92	AD-2018	AD	2018	S2_208999109	2	208999109	2.12895e-06	0.0757018	1.57077
93	AD-2018	AD	2018	S2_209496839	2	209496839	5.76618e-05	0.0550892	1.77813	GRMZM5G873123_T02	protein_coding
94	AD-2018	AD	2018	S2_211723140	2	211723140	6.20646e-05	0.0546279	-1.8902	GRMZM2G056467_T01	protein_coding
95	AD-2018	AD	2018	S3_175689183	3	175689183	9.81663e-06	0.0661732	-1.19428
96	AD-2018	AD	2018	S4_219994248	4	219994248	7.95778e-05	0.0530694	0.540697	GRMZM2G051185_T01	protein_coding
97	AD-2018	AD	2018	S4_236093676	4	236093676	7.62827e-05	0.0533345	2.07357	GRMZM2G351747_T01	protein_coding
98	AD-2018	AD	2018	S5_172100748	5	172100748	9.82109e-05	0.05175	-1.24191	GRMZM2G414955_T01	protein_coding
99	AD-2018	AD	2018	S6_76236247	6	76236247	5.15489e-05	0.0557917	1.90126
100	AD-2018	AD	2018	S6_161833452	6	161833452	5.36532e-05	0.0555409	-1.96439	GRMZM2G021406_T01	protein_coding
101	AD-2018	AD	2018	S8_62836711	8	62836711	3.87524e-05	0.05758	0.147314	GRMZM2G079938_T02	AB hydrolase-1 domain-containing protein
102	AD-2018	AD	2018	S8_79188751	8	79188751	1.90151e-05	0.0620386	0.619651	GRMZM2G012901_T01	protein_coding
103	AD-2018	AD	2018	S10_130700001	10	130700001	4.85752e-05	0.0561641	2.3848	GRMZM2G061499_T02	protein_coding
104	AD-2017	AD	2017	S1_154507157	1	154507157	7.27713e-05	0.05363	4.38688	GRMZM2G092652_T01	U-box domain-containing protein 13
105	AD-2017	AD	2017	S1_212981974	1	212981974	3.32238e-05	0.0585444	4.05177	GRMZM2G152485_T06	protein_coding
106	AD-2017	AD	2017	S1_212982013	1	212982013	4.66211e-05	0.0564215	4.42727	GRMZM2G152485_T06	protein_coding
107	AD-2017	AD	2017	S1_251143915	1	251143915	7.21928e-05	0.0536801	2.28348	GRMZM5G859316_T03	Expansins
108	AD-2017	AD	2017	S2_29055731	2	29055731	4.12906e-05	0.0571824	1.04655
109	AD-2017	AD	2017	S2_211029206	2	211029206	8.63499e-05	0.0525572	3.10896	GRMZM2G101142_T01	protein_coding
110	AD-2017	AD	2017	S3_3986819	3	3986819	8.86941e-05	0.0523892	-2.50135
111	AD-2017	AD	2017	S3_206753164	3	206753164	4.56423e-05	0.0565545	2.40383
112	AD-2017	AD	2017	S4_159570347	4	159570347	4.46264e-05	0.0566956	-5.8677
113	AD-2017	AD	2017	S4_159570360	4	159570360	4.46264e-05	0.0566956	-5.8677
114	AD-2017	AD	2017	S4_235453550	4	235453550	6.31431e-06	0.0689287	-4.0272	GRMZM2G339909_T01	protein_coding
115	AD-2017	AD	2017	S5_2923914	5	2923914	7.6933e-05	0.0532813	2.30625	GRMZM2G423139_T01	protein_coding
116	AD-2017	AD	2017	S5_6867779	5	6867779	6.45295e-05	0.0543837	-2.52298	GRMZM2G072315_T02	protein_coding
117	AD-2017	AD	2017	S5_69125623	5	69125623	4.56021e-05	0.05656	-4.88938	GRMZM2G152914_T01	protein_coding
118	AD-2017	AD	2017	S5_69283534	5	69283534	8.42155e-05	0.0527141	-4.68934	GRMZM2G160996_T02	protein_coding
119	AD-2017	AD	2017	S5_69283557	5	69283557	8.42155e-05	0.0527141	-4.68934	GRMZM2G160996_T02
120	AD-2017	AD	2017	S5_69435496	5	69435496	2.66166e-05	0.0599333	-1.97429	GRMZM2G117012_T01	protein_coding
121	AD-2017	AD	2017	S5_69435513	5	69435513	3.29238e-05	0.0586012	-2.05392	GRMZM2G117012_T01
122	AD-2017	AD	2017	S5_69435514	5	69435514	3.29238e-05	0.0586012	-2.05392	GRMZM2G117012_T01
123	AD-2017	AD	2017	S5_82325945	5	82325945	2.16944e-05	0.0612136	2.73021	GRMZM2G171648_T01	protein_coding
124	AD-2017	AD	2017	S5_82953084	5	82953084	8.37274e-05	0.0527506	1.89211	GRMZM2G158520_T01	protein_coding
125	AD-2017	AD	2017	S5_145140411	5	145140411	9.27506e-05	0.0521088	-0.204006
126	AD-2017	AD	2017	S5_163119125	5	163119125	3.61864e-05	0.0580093	-2.15275	GRMZM2G043602_T01	protein_coding
127	AD-2017	AD	2017	S5_212245497	5	212245497	8.52369e-05	0.0526385	-7.37613	GRMZM2G098058_T01	protein_coding
128	AD-2017	AD	2017	S8_166837731	8	166837731	4.6854e-05	0.0563903	-3.52707	GRMZM2G316534_T01	protein_coding
129	AD-2017	AD	2017	S9_1634820	9	1634820	9.29606e-05	0.0520946	0.730636	GRMZM2G143862_T01
130	AD-2017	AD	2017	S9_1634830	9	1634830	9.29606e-05	0.0520946	0.730636	GRMZM2G143862_T01
131	AD-2017	AD	2017	S9_130860645	9	130860645	5.40857e-05	0.0554906	-5.16489
132	AD-2017	AD	2017	S9_146154415	9	146154415	5.47886e-05	0.0554096	-1.78939	AC233893.1_FGT006
133	AD-2017	AD	2017	S9_153775211	9	153775211	9.97955e-05	0.0516497	-1.81456	GRMZM2G064005_T01	protein_coding
134	AD-2017	AD	2017	S10_134043542	10	134043542	7.26307e-05	0.0536422	2.76902	GRMZM2G126742_T01	protein_coding
135	AD-2017	AD	2017	S10_134043681	10	134043681	4.36814e-05	0.0568297	2.42476	GRMZM2G126742_T01	protein_coding
136	ASI-Across	ASI	Across	S1_32091829	1	32091829	3.77494e-05	0.0593586	-0.232957	GRMZM2G152663_T01
137	ASI-Across	ASI	Across	S1_58720611	1	58720611	2.83807e-06	0.0759609	0.340758	GRMZM2G177532_T02
138	ASI-Across	ASI	Across	S1_68545943	1	68545943	8.37335e-05	0.0542288	0.121273	GRMZM2G077991_T02
139	ASI-Across	ASI	Across	S1_68546103	1	68546103	8.88529e-05	0.0538466	0.125276	GRMZM2G077991_T02
140	ASI-Across	ASI	Across	S1_68546127	1	68546127	6.87368e-05	0.0555	0.121104	GRMZM2G077991_T02
141	ASI-Across	ASI	Across	S1_71024141	1	71024141	3.77737e-05	0.0593544	0.229659	GRMZM2G110067_T01
142	ASI-Across	ASI	Across	S1_206314180	1	206314180	1.00649e-05	0.0678542	0.457454
143	ASI-Across	ASI	Across	S1_240469014	1	240469014	3.5316e-05	0.0597874	0.372109
144	ASI-Across	ASI	Across	S2_234796315	2	234796315	7.22995e-05	0.0551746	0.224512	GRMZM2G020805_T01
145	ASI-Across	ASI	Across	S3_190458279	3	190458279	1.87705e-05	0.063852	-0.206426	GRMZM2G322728_T02
146	ASI-Across	ASI	Across	S5_16320077	5	16320077	9.71708e-05	0.0532701	-0.184318	GRMZM2G134957_T01
147	ASI-Across	ASI	Across	S5_16320079	5	16320079	7.07578e-05	0.0553134	-0.196915	GRMZM2G134957_T01
148	ASI-Across	ASI	Across	S5_23836662	5	23836662	8.00215e-05	0.0545209	0.172947
149	ASI-Across	ASI	Across	S5_23836667	5	23836667	8.00215e-05	0.0545209	0.172947
150	ASI-Across	ASI	Across	S5_23836669	5	23836669	8.00215e-05	0.0545209	0.172947
151	ASI-Across	ASI	Across	S5_31906611	5	31906611	3.3725e-05	0.060084	0.102846	GRMZM2G046438_T01
152	ASI-Across	ASI	Across	S5_205177154	5	205177154	2.89187e-05	0.0610731	0.2344	GRMZM5G898898_T01
153	ASI-Across	ASI	Across	S6_156878763	6	156878763	3.21664e-05	0.0603884	0.403512	GRMZM2G078781_T02
154	ASI-Across	ASI	Across	S8_165273389	8	165273389	2.76867e-05	0.0613532	0.182808	GRMZM2G092817_T01
155	ASI-Across	ASI	Across	S10_73205880	10	73205880	5.61255e-05	0.0568054	-0.0602691	GRMZM2G133512_T01
156	ASI-Across	ASI	Across	S10_73205915	10	73205915	5.61255e-05	0.0568054	-0.0602691	GRMZM2G133512_T01
157	ASI-2018	ASI	2018	S2_7193087	2	7193087	5.75265e-06	0.06951	0.426883
158	ASI-2018	ASI	2018	S3_211023899	3	211023899	7.61646e-05	0.0533442	0.500044	GRMZM5G867983_T01
159	ASI-2018	ASI	2018	S4_33361597	4	33361597	1.92396e-05	0.0619652	0.267989	GRMZM2G402653_T01
160	ASI-2018	ASI	2018	S4_158996414	4	158996414	9.10632e-05	0.0522239	-0.146296	GRMZM2G026024_T01
161	ASI-2018	ASI	2018	S4_158996456	4	158996456	9.10632e-05	0.0522239	-0.14855	GRMZM2G026024_T01
162	ASI-2018	ASI	2018	S4_158996458	4	158996458	9.10632e-05	0.0522239	-0.14855	GRMZM2G026024_T01
163	ASI-2018	ASI	2018	S4_158996459	4	158996459	9.10632e-05	0.0522239	-0.14855	GRMZM2G026024_T01
164	ASI-2018	ASI	2018	S4_158996461	4	158996461	9.10632e-05	0.0522239	-0.14855	GRMZM2G026024_T01
165	ASI-2018	ASI	2018	S4_158996468	4	158996468	9.10632e-05	0.0522239	-0.14855	GRMZM2G026024_T01
166	ASI-2018	ASI	2018	S5_16320077	5	16320077	9.77771e-05	0.0517778	-0.164353	GRMZM2G134957_T01
167	ASI-2018	ASI	2018	S5_16320079	5	16320079	5.2407e-05	0.0556882	-0.184321	GRMZM2G134957_T01
168	ASI-2018	ASI	2018	S5_76729287	5	76729287	1.10944e-05	0.0654085	0.230209	GRMZM2G398559_T01
169	ASI-2018	ASI	2018	S5_76729288	5	76729288	1.10944e-05	0.0654085	0.231637	GRMZM2G398559_T01
170	ASI-2018	ASI	2018	S5_76729289	5	76729289	1.10944e-05	0.0654085	0.231637	GRMZM2G398559_T01
171	ASI-2018	ASI	2018	S5_76729290	5	76729290	2.71257e-05	0.0598146	0.230108	GRMZM2G398559_T01
172	ASI-2018	ASI	2018	S5_76936003	5	76936003	5.48866e-05	0.0553984	0.220628	GRMZM2G399858_T01
173	ASI-2018	ASI	2018	S6_7156722	6	7156722	1.59783e-05	0.0631274	0.217937	GRMZM2G057026_T01
174	ASI-2018	ASI	2018	S6_7156761	6	7156761	8.18947e-05	0.0528894	0.197556	GRMZM2G057026_T01
175	ASI-2018	ASI	2018	S6_58444848	6	58444848	8.94726e-05	0.0523344	-0.279429
176	ASI-2018	ASI	2018	S6_71015469	6	71015469	9.32016e-05	0.0520783	0.219304	GRMZM2G152041_T01
177	ASI-2018	ASI	2018	S6_76508642	6	76508642	9.44271e-05	0.0519964	0.243952
178	ASI-2018	ASI	2018	S6_130132020	6	130132020	7.64238e-05	0.0533229	-0.26372	GRMZM5G886257_T01
179	ASI-2018	ASI	2018	S6_156878763	6	156878763	1.93615e-05	0.0619256	0.491872	GRMZM2G078781_T02
180	ASI-2018	ASI	2018	S6_159562212	6	159562212	7.13374e-07	0.0824871	0.486414
181	ASI-2018	ASI	2018	S6_159562364	6	159562364	1.51554e-05	0.0634581	-0.286789
182	ASI-2018	ASI	2018	S6_159562404	6	159562404	8.73076e-06	0.0669055	-0.304581
183	ASI-2018	ASI	2018	S7_31520151	7	31520151	8.13879e-05	0.0529283	0.555118	GRMZM2G438871_T01
184	ASI-2018	ASI	2018	S7_108844203	7	108844203	8.69955e-05	0.0525105	-0.191167	GRMZM2G126507_T02
185	ASI-2018	ASI	2018	S7_108844204	7	108844204	8.69955e-05	0.0525105	-0.191127	GRMZM2G126507_T02
186	ASI-2018	ASI	2018	S7_172947914	7	172947914	2.76055e-05	0.0597048	0.26036	GRMZM5G807560_T01
187	ASI-2018	ASI	2018	S8_167267634	8	167267634	7.40655e-05	0.0535195	-0.253561
188	ASI-2017	ASI	2017	S1_52393720	1	52393720	1.47897e-05	0.0636109	1.76093
189	ASI-2017	ASI	2017	S1_58720611	1	58720611	3.0888e-05	0.0590011	1.396	GRMZM2G177532_T02
190	ASI-2017	ASI	2017	S1_71024141	1	71024141	6.61691e-05	0.0542264	1.13079	GRMZM2G110067_T01
191	ASI-2017	ASI	2017	S1_80320978	1	80320978	6.93617e-05	0.0539309	0.887397	GRMZM2G093962_T05
192	ASI-2017	ASI	2017	S1_80321052	1	80321052	6.76415e-05	0.0540884	0.862351	GRMZM2G093962_T05
193	ASI-2017	ASI	2017	S1_240469014	1	240469014	5.92522e-05	0.0549186	1.77333
194	ASI-2017	ASI	2017	S2_48147209	2	48147209	6.38523e-05	0.0544498	0.651658	GRMZM2G053111_T01
195	ASI-2017	ASI	2017	S2_48147221	2	48147221	6.38523e-05	0.0544498	0.651658	GRMZM2G053111_T01
196	ASI-2017	ASI	2017	S2_210032585	2	210032585	1.19057e-05	0.0649673	1.60967	GRMZM2G043154_T01
197	ASI-2017	ASI	2017	S2_234796315	2	234796315	3.43344e-05	0.0583384	1.25953	GRMZM2G020805_T01
198	ASI-2017	ASI	2017	S3_168525039	3	168525039	4.13051e-05	0.0571803	1.29429	GRMZM2G086845_T02
199	ASI-2017	ASI	2017	S3_168525053	3	168525053	4.13051e-05	0.0571803	1.29429	GRMZM2G086845_T02
200	ASI-2017	ASI	2017	S3_218189554	3	218189554	7.2897e-05	0.0536192	1.02838
201	ASI-2017	ASI	2017	S4_16843870	4	16843870	7.79902e-06	0.0676104	2.7844	GRMZM2G117609_T01
202	ASI-2017	ASI	2017	S4_25984893	4	25984893	2.97634e-05	0.0592334	1.25615	GRMZM2G026459_T03
203	ASI-2017	ASI	2017	S4_160021520	4	160021520	8.50564e-05	0.0526518	1.74229
204	ASI-2017	ASI	2017	S4_194911856	4	194911856	9.69602e-05	0.0518304	0.72337	GRMZM2G038479_T01
205	ASI-2017	ASI	2017	S4_196824243	4	196824243	6.19079e-05	0.0546437	0.726984	GRMZM2G343828_T01
206	ASI-2017	ASI	2017	S5_7523543	5	7523543	9.22083e-05	0.0521455	0.707692	GRMZM2G132121_T02
207	ASI-2017	ASI	2017	S5_159913392	5	159913392	8.02999e-06	0.0674281	1.17189	GRMZM2G028677_T01
208	ASI-2017	ASI	2017	S5_204803852	5	204803852	9.64302e-05	0.0518648	1.22631	GRMZM2G075136_T01
209	ASI-2017	ASI	2017	S5_204803857	5	204803857	9.64302e-05	0.0518648	1.22631	GRMZM2G075136_T01
210	ASI-2017	ASI	2017	S5_205177154	5	205177154	2.55032e-05	0.0602008	1.07733	GRMZM5G898898_T01
211	ASI-2017	ASI	2017	S5_205181453	5	205181453	6.08739e-06	0.0691571	1.31298
212	ASI-2017	ASI	2017	S5_205181456	5	205181456	6.08739e-06	0.0691571	1.31298
213	ASI-2017	ASI	2017	S5_205535188	5	205535188	1.29633e-05	0.0644352	1.23437	GRMZM2G151204_T01
214	ASI-2017	ASI	2017	S6_147900706	6	147900706	9.95438e-05	0.0516655	0.633957
215	ASI-2017	ASI	2017	S10_1731001	10	1731001	8.24794e-05	0.0528448	1.55906	GRMZM2G130062_T01
216	PH-Across	PH	Across	S1_80662271	1	80662271	8.97204e-05	0.053784	-3.42892	GRMZM2G087243_T01
217	PH-Across	PH	Across	S1_80662661	1	80662661	1.51742e-05	0.0652186	-3.40549	GRMZM2G087243_T01
218	PH-Across	PH	Across	S2_188416495	2	188416495	5.39909e-06	0.0718467	3.80108	GRMZM2G137558_T01
219	PH-Across	PH	Across	S3_153769448	3	153769448	3.57348e-05	0.0597115	-6.11506
220	PH-Across	PH	Across	S3_153769928	3	153769928	7.07906e-05	0.0553104	-5.55071
221	PH-Across	PH	Across	S6_147221248	6	147221248	7.38269e-05	0.0550399	0.408342
222	PH-Across	PH	Across	S7_9363821	7	9363821	6.62868e-05	0.0557338	1.85587	GRMZM2G456059_T01
223	PH-Across	PH	Across	S7_9367850	7	9367850	7.79841e-05	0.0546871	0.53514
224	PH-Across	PH	Across	S7_153450970	7	153450970	5.73844e-05	0.0566625	2.82895	GRMZM2G180082_T01
225	PH-Across	PH	Across	S7_153450983	7	153450983	5.73844e-05	0.0566625	2.79273	GRMZM2G180082_T01
226	PH-Across	PH	Across	S8_162784156	8	162784156	9.55971e-05	0.0533753	-2.14874
227	PH-Across	PH	Across	S8_172989477	8	172989477	2.7605e-05	0.0613722	-4.64301	GRMZM2G027016_T01
228	PH-Across	PH	Across	S10_147245009	10	147245009	6.1057e-05	0.056263	-1.90137	GRMZM2G107620_T01
229	PH-2018	PH	2018	S2_189087809	2	189087809	3.69693e-05	0.0578752	3.44672	AC233861.1_FGT001
230	PH-2018	PH	2018	S3_2942264	3	2942264	3.24966e-05	0.0586831	1.14047	GRMZM2G061018_T02
231	PH-2018	PH	2018	S3_153769448	3	153769448	1.49367e-05	0.0635491	-5.29353
232	PH-2018	PH	2018	S3_153769928	3	153769928	2.86876e-05	0.059464	-4.8828
233	PH-2018	PH	2018	S6_97340172	6	97340172	9.22462e-05	0.052143	5.4187	GRMZM2G018105_T02
234	PH-2018	PH	2018	S6_130031239	6	130031239	8.7558e-05	0.0524701	-2.37842
235	PH-2018	PH	2018	S7_4826859	7	4826859	5.90883e-05	0.054936	1.49855	GRMZM2G167892_T03
236	PH-2018	PH	2018	S8_20526402	8	20526402	9.14649e-05	0.0521963	-1.55576
237	PH-2018	PH	2018	S8_20526406	8	20526406	9.14649e-05	0.0521963	-1.55576
238	PH-2018	PH	2018	S8_138860746	8	138860746	6.67923e-05	0.0541676	-3.09114
239	PH-2018	PH	2018	S8_162784156	8	162784156	7.4832e-05	0.0534549	-1.92791
240	PH-2018	PH	2018	S9_23528742	9	23528742	8.93275e-05	0.0523446	-3.25249	GRMZM2G396553_T01
241	PH-2017	PH	2017	S1_80662661	1	80662661	9.29419e-05	0.0520958	-4.64895	GRMZM2G087243_T01
242	PH-2017	PH	2017	S2_140326232	2	140326232	4.08281e-05	0.057253	-4.5599	GRMZM5G821024_T01
243	PH-2017	PH	2017	S2_188416495	2	188416495	3.99208e-05	0.0573939	4.97171	GRMZM2G137558_T01
244	PH-2017	PH	2017	S2_217345339	2	217345339	7.92821e-05	0.0530927	3.89947	GRMZM2G003409_T02
245	PH-2017	PH	2017	S3_1591296	3	1591296	8.12142e-05	0.0529417	-4.86211
246	PH-2017	PH	2017	S3_2944480	3	2944480	5.06424e-05	0.0559029	5.40803	GRMZM2G061018_T01
247	PH-2017	PH	2017	S3_19778842	3	19778842	3.4534e-05	0.0583021	6.13179
248	PH-2017	PH	2017	S4_211045950	4	211045950	2.24556e-05	0.0609977	4.9226	GRMZM2G149739_T01
249	PH-2017	PH	2017	S5_216088697	5	216088697	5.98534e-05	0.0548553	-2.94626	GRMZM2G087924_T02
250	PH-2017	PH	2017	S6_39564314	6	39564314	2.43114e-05	0.0605005	4.87352	GRMZM2G176455_T01
251	PH-2017	PH	2017	S7_100803155	7	100803155	2.90523e-05	0.0593849	4.43271	GRMZM2G176759_T01
252	PH-2017	PH	2017	S9_11749657	9	11749657	1.44937e-05	0.0637374	5.31253	GRMZM2G177098_T01
253	PH-2017	PH	2017	S9_11749659	9	11749659	1.44937e-05	0.0637374	5.37859	GRMZM2G177098_T01
254	PH-2017	PH	2017	S9_11749661	9	11749661	1.44937e-05	0.0637374	5.37859	GRMZM2G177098_T01
255	PH-2017	PH	2017	S9_11749699	9	11749699	8.59941e-05	0.0525831	3.33924	GRMZM2G177098_T01
256	KN-2018	KN	2018	S2_41895131	2	41895131	3.73707e-05	0.0578075	241.225
257	KN-2018	KN	2018	S2_41895147	2	41895147	3.73707e-05	0.0578075	241.154
258	KN-2018	KN	2018	S2_157237064	2	157237064	8.70229e-05	0.0525085	-299.078	GRMZM2G166245_T01
259	KN-2018	KN	2018	S3_127518652	3	127518652	7.08269e-05	0.0537998	-334.563
260	KN-2018	KN	2018	S3_127518662	3	127518662	3.85363e-05	0.057615	-345.448
261	KN-2018	KN	2018	S4_83198559	4	83198559	8.3031e-05	0.052803	-225.209	GRMZM2G168002_T04
262	KN-2018	KN	2018	S5_15324004	5	15324004	9.21364e-05	0.0521504	-167.508	GRMZM2G161418_T01
263	KN-2018	KN	2018	S5_22599062	5	22599062	2.08602e-05	0.061459	141.259	GRMZM2G002859_T01
264	KN-2018	KN	2018	S6_87402488	6	87402488	3.22596e-05	0.0587289	243.3	GRMZM2G114337_T01
265	KN-2018	KN	2018	S6_157029418	6	157029418	6.79712e-05	0.0540579	-154.775
266	KN-2018	KN	2018	S9_151302911	9	151302911	9.8501e-05	0.0517315	-172.32	GRMZM2G178916_T03
267	KN-2018	KN	2018	S9_151302923	9	151302923	9.8501e-05	0.0517315	-172.32	GRMZM2G178916_T03
268	CL-2018	CL	2018	S1_6533372	1	6533372	3.90596e-05	0.0575305	0.00987464	GRMZM5G887276_T04
269	CL-2018	CL	2018	S1_6533381	1	6533381	3.90596e-05	0.0575305	0.00987464	GRMZM5G887276_T04
270	CL-2018	CL	2018	S1_12520079	1	12520079	9.14636e-05	0.0521964	0.129934	GRMZM2G165972_T04
271	CL-2018	CL	2018	S1_60091076	1	60091076	8.33094e-05	0.052782	0.0696991
272	CL-2018	CL	2018	S2_39426887	2	39426887	3.2864e-05	0.0586126	-0.0605979	GRMZM2G330430_T01
273	CL-2018	CL	2018	S2_39426933	2	39426933	3.04191e-05	0.0590969	-0.0559234	GRMZM2G330430_T01
274	CL-2018	CL	2018	S2_41245531	2	41245531	5.61422e-05	0.0552566	0.069072	GRMZM2G394321_T01
275	CL-2018	CL	2018	S2_108143505	2	108143505	5.43975e-05	0.0554545	-0.145148
276	CL-2018	CL	2018	S3_54175702	3	54175702	5.06252e-05	0.055905	-0.0774708	GRMZM2G147791_T01
277	CL-2018	CL	2018	S3_196566597	3	196566597	8.73768e-05	0.0524831	0.0954263
278	CL-2018	CL	2018	S4_178381544	4	178381544	6.36401e-05	0.0544707	-0.0753815
279	CL-2018	CL	2018	S5_3834681	5	3834681	6.88754e-05	0.053975	-0.0673509	GRMZM5G883250_T01
280	CL-2018	CL	2018	S5_3834697	5	3834697	6.88754e-05	0.053975	-0.0670176	GRMZM5G883250_T01
281	CL-2018	CL	2018	S6_3869692	6	3869692	1.1111e-07	0.0939562	0.111511	GRMZM2G030325_T01
282	CL-2018	CL	2018	S7_143414631	7	143414631	9.56433e-06	0.0663359	-0.0476173
283	CL-2018	CL	2018	S7_168994991	7	168994991	4.27908e-05	0.0569588	0.0531778	GRMZM2G150731_T01
284	CL-2018	CL	2018	S9_138425015	9	138425015	9.80792e-05	0.0517584	-0.0796341	GRMZM2G054300_T05
285	CL-2018	CL	2018	S9_147612045	9	147612045	9.46656e-05	0.0519806	-0.0337409	GRMZM5G838403_T01
286	CL-2018	CL	2018	S9_147612064	9	147612064	9.46656e-05	0.0519806	-0.0337409	GRMZM5G838403_T01
287	CL-2018	CL	2018	S9_147629104	9	147629104	1.97091e-05	0.0618143	0.0792106	GRMZM2G403944_T01
288	CL-2018	CL	2018	S9_147629149	9	147629149	1.86666e-05	0.0621544	0.0748959	GRMZM2G403944_T01
289	CL-2018	CL	2018	S9_149245965	9	149245965	2.58401e-05	0.0601187	0.0750002	GRMZM2G004466_T02
290	CL-2018	CL	2018	S10_10803013	10	10803013	8.48574e-06	0.0670833	0.111719	GRMZM2G005848_T01
291	CL-2018	CL	2018	S10_59877657	10	59877657	9.66197e-05	0.0518525	0.0910703
292	CL-2018	CL	2018	S10_73283146	10	73283146	4.51407e-05	0.0566237	0.128766	GRMZM2G407495_T01
293	CL-2018	CL	2018	S10_76586897	10	76586897	1.36373e-05	0.0641183	0.113497	GRMZM2G042895_T01
294	CL-2018	CL	2018	S10_124732432	10	124732432	6.47437e-05	0.0543629	0.0784421	GRMZM2G021482_T01
295	CL-2018	CL	2018	S2_144046894	2	144046894	3.7391e-05	0.0578041	-0.108506	GRMZM2G116812_T01
296	CG-2018	CG	2018	S3_184817798	3	184817798	7.1702e-05	0.0537228	-0.0913389	GRMZM2G059562_T01
297	CG-2018	CG	2018	S3_184817898	3	184817898	8.53536e-05	0.05263	-0.0834684	GRMZM2G059562_T01
298	CG-2018	CG	2018	S3_191840050	3	191840050	5.85536e-05	0.054993	0.228271	GRMZM5G817173_T03
299	CG-2018	CG	2018	S3_192022022	3	192022022	2.85517e-06	0.0738757	-0.191456	GRMZM2G047262_T01
300	CG-2018	CG	2018	S4_837716	4	837716	8.72815e-05	0.0524899	-0.163727	GRMZM2G073779_T01
301	CG-2018	CG	2018	S5_18623150	5	18623150	4.27852e-05	0.0569596	0.260334	GRMZM2G363437_T02
302	CG-2018	CG	2018	S5_18623157	5	18623157	4.27852e-05	0.0569596	0.260334	GRMZM2G363437_T02
303	CG-2018	CG	2018	S5_194163064	5	194163064	5.87435e-05	0.0549727	0.284286	GRMZM2G090595_T01
304	CG-2018	CG	2018	S5_198208124	5	198208124	1.19195e-05	0.0649601	-0.193336	GRMZM2G058943_T01
305	CG-2018	CG	2018	S5_199166363	5	199166363	6.8582e-05	0.0540018	-0.0660698	GRMZM2G442920_T01
306	CG-2018	CG	2018	S5_199166381	5	199166381	5.64453e-05	0.0552229	-0.064077	GRMZM2G442920_T01
307	CG-2018	CG	2018	S5_199167149	5	199167149	7.56089e-05	0.0533902	0.217888	GRMZM2G141975_T01
308	CG-2018	CG	2018	S9_116680152	9	116680152	8.59511e-05	0.0525862	0.0637822	GRMZM2G073260_T01
309	CG-2018	CG	2018	S9_151287117	9	151287117	8.24853e-06	0.0672604	-0.19752	GRMZM2G178847_T03
310	CG-2018	CG	2018	S10_117475838	10	117475838	8.44397e-05	0.0526975	0.266994	GRMZM2G039399_T01
311	CG-2018	CG	2018	S10_131880085	10	131880085	4.40456e-05	0.0567777	0.200309	GRMZM2G400570_T01
